# Supplementary material for: Optimizing Hospital Performance Evaluation: A Mixed-Methods Study to Develop a Multidimensional Framework for Scientific Validity, Structural Fairness, and Staff Motivation
Source: Research Square preprint supplement (doi:10.21203/rs.3.rs-8400306/v1), 2026-01-16
Supplement: Supplementary file 1 [file 13a9b795eb48b69ec0190dbc.docx]

**Supplementary File 1: Hospital Performance Evaluation Questionnaire**

**Description** This questionnaire was developed to assess administrative and logistical staff perceptions of hospital performance evaluation systems. The final instrument consists of 21 items.

**Instructions** Please evaluate the current hospital performance evaluation system by indicating your level of agreement with the following statements.

1. Is the performance evaluation process reasonable?
2. Are the performance indicators designed reasonably?
3. Is the performance cycle design reasonable? (e.g., annual cycle)
4. Is the performance evaluation method reasonable?
5. Is the coefficient design for non-middle-level staff reasonable?
6. Is the ratio design for key personnel reasonable?
7. Is the seniority coefficient design reasonable?
8. Is the secondary departmental assessment reasonable?
9. Is the feedback method reasonable?
10. Can the current method professionally assess the work?
11. Can the current method objectively assess the work?
12. Are the results commensurate with the position?
13. Are the results reasonable compared to peers in the same department with similar qualifications?
14. Are the results reasonable compared to peers in different departments with similar qualifications?
15. Can the results objectively evaluate the work?
16. Does the management method have talent attraction potential?
17. Does the management method motivate you to work harder?
18. Does the management method promote personal growth?
19. Does the management method make your work feel meaningful?
20. Does the management method increase teamwork?
21. Does the management method enhance satisfaction and sense of belonging?
